# Supplementary material
Source: Springer Nature journal article supplement (https://www.springermedizin.de/resource/supplementary/12990_2009_228_MOESM3_ESM.pdf/9612838)

### dynamic brush

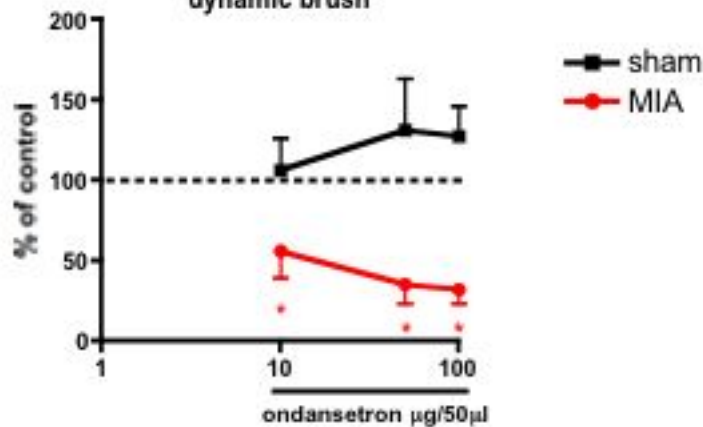

### mechanical punctate

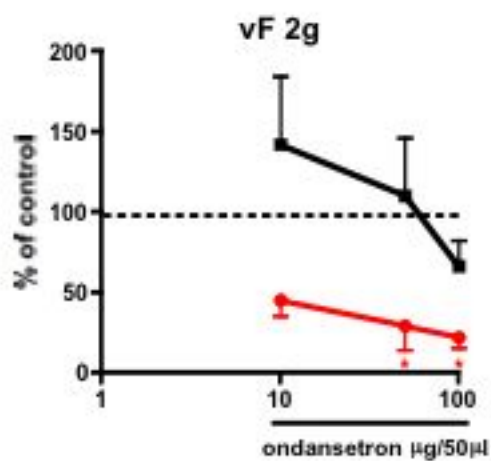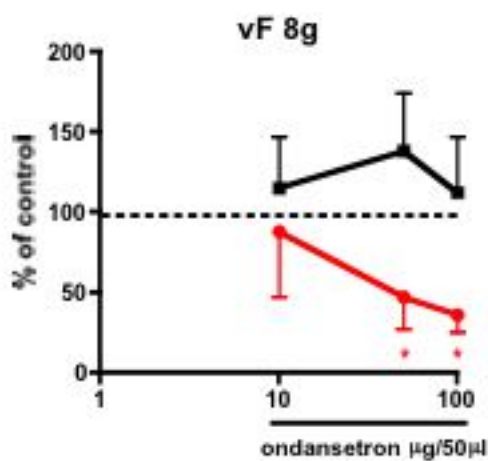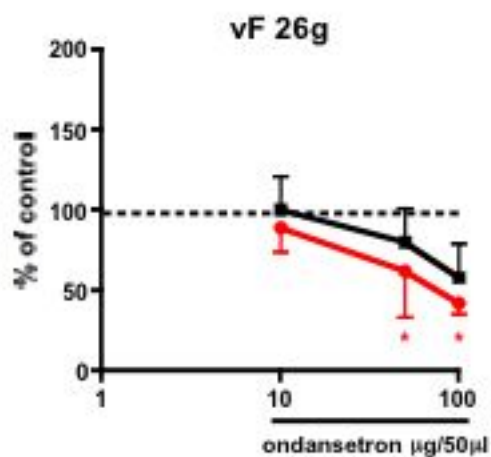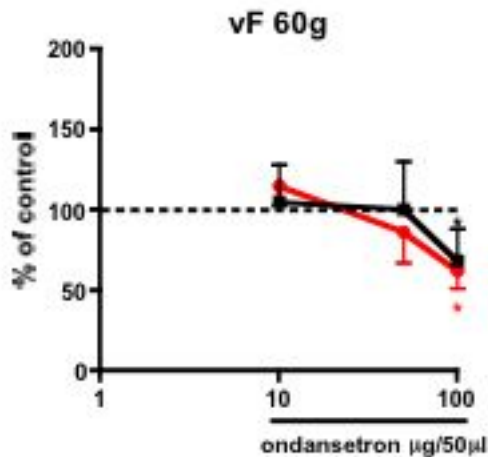

Supplement: MOESM3 [file 9612838]
